# Supplementary material for: Muscle oxidative phosphorylation quantitation using creatine chemical exchange saturation transfer (CrCEST) MRI in mitochondrial disorders
Source: JCI journal article supplement (doi:10.1172/jci.insight.88207), 2016-11-02
Supplement: sd1 [file 1]

## SUPPLEMENTARY

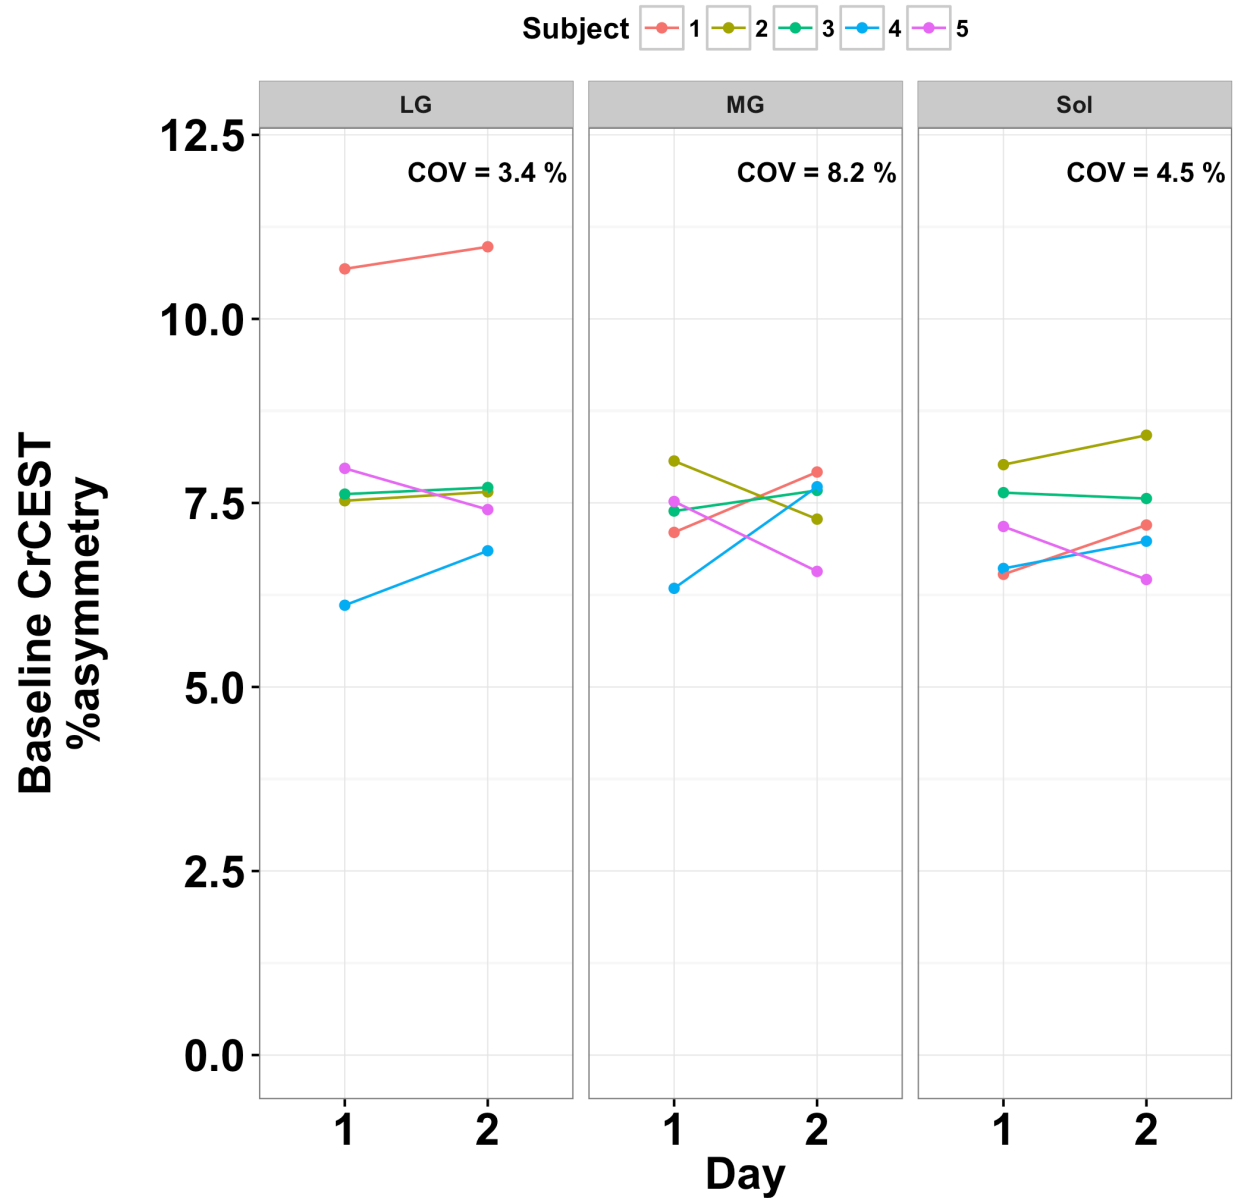

**Supplementary Figure 1.** Reproducibility of baseline CrCEST % asymmetry, an index of free creatine concentration. For each of five subjects (shown in different colors), CrCEST measurements were obtained on a 3T MRI scanner on each of two different days, separated by less than one week. The degree of agreement between individual measurements and summary within-participant coefficient of variation (COV) estimates for these measurements are shown. LG = lateral gastrocnemius; MG = medial gastrocnemius; Sol = soleus.

## SUPPLEMENTARY FIGURES (continued)

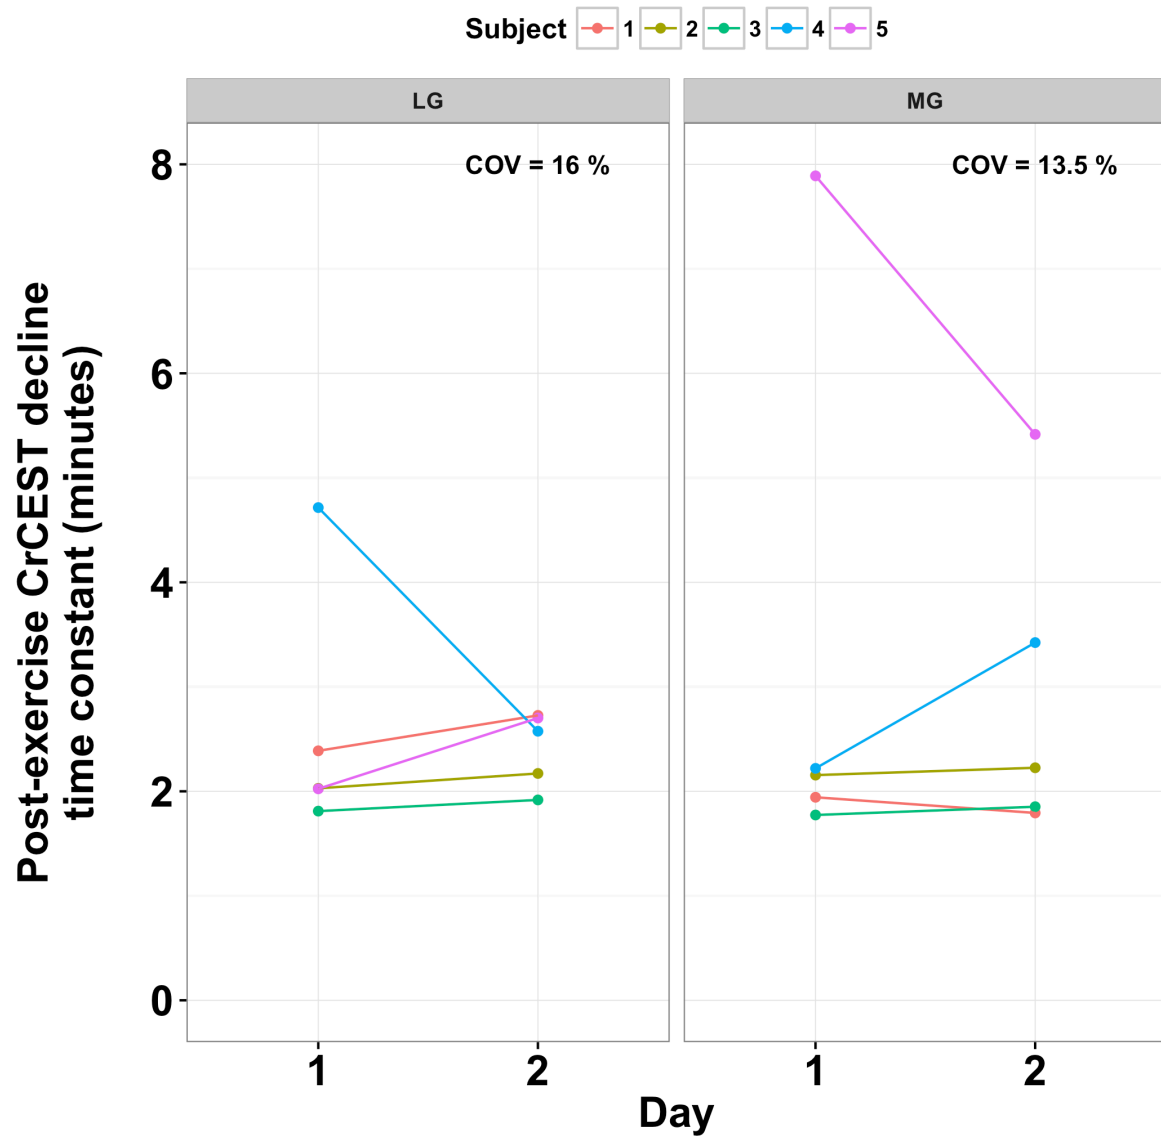

**Supplementary Figure 2.** Reproducibility of post-exercise CrCEST decline exponential time constant ( $\tau_{Cr}$ ), an index of free creatine concentration. For each of five subjects (shown in different colors), CrCEST measurements were obtained on a 3T MRI scanner on each of two different days, separated by less than one week. The degree of agreement between individual measurements and summary within-participant coefficient of variation (COV) estimates for these measurements are shown. LG = lateral gastrocnemius; MG = medial gastrocnemius; Sol = soleus.

**Supplemental Table 1.** Mixed effects regression models including the association of intentional exercise with (Model 1) log-transformed post-exercise CrCEST decline time constant ( $\tau_{Cr}$ , in minutes), an index of skeletal muscle OXPHOS capacity, where prolonged  $\tau_{Cr}$  suggests lower OXPHOS capacity and (Model 2) log-transformed resting CrCEST (% asymmetry), an index of free creatine concentration, where higher CrCEST may reflect greater bioenergetic capacity at rest.

|                                        | Model 1<br>standardized $\beta$<br>(p-value) | Model 2<br>standardized $\beta$<br>(p-value) |
|----------------------------------------|----------------------------------------------|----------------------------------------------|
| Outcome                                | $\tau_{Cr}$                                  | CrCEST                                       |
| Mitochondrial disease status           | <b>0.32 (0.027)</b>                          | -0.08 (NS)                                   |
| <b>Muscle group</b>                    |                                              |                                              |
| Lateral gastrocnemius (reference)      | -                                            | -                                            |
| Medial gastrocnemius                   | 0.05 (NS)                                    | 0.06 (NS)                                    |
| Soleus                                 | 0.14 (NS)                                    | <b>0.35 (0.0027)</b>                         |
| Intentional Exercise<br>(MET-hours/wk) | -0.004 (NS)                                  | 0.23 (0.064)                                 |

Each of the models include the subject from which the measurement was obtained (as a random effect) and the clinical covariates shown (as fixed effects). For Model 1, n=26 subjects contributing a total of 74 muscle-specific post-exercise CrCEST recovery estimates were included (i.e., if subjects exercised more than one muscle group, then more than one post-exercise recovery time constant could be calculated); the mixed effects modeling strategy accounts statistically for the effects of obtaining multiple measurements per subject. For Model 2, n=27 subjects contributing a total of 84 muscle-specific CrCEST measurements were included; the mixed effects modeling strategy accounts statistically for the effects of obtaining multiple measurements per subject. Coefficients are represented as standardized  $\beta$  values, with their corresponding p values; statistically significant results are shown in bold text. NS = not significant; AIC = Akaike Information Criterion; BIC = Bayesian Information Criterion.
